# Supplementary material for: Development of the BioCalculus Assessment (BCA)
Source: Atypon-hosted journal article supplement (doi:10.1187/cbe.18-10-0216), 2020-02-14
Supplement: combinedsupmats.pdf [file combinedsupmats.pdf]

# Supplemental Material

*CBE—Life Sciences Education*

Taylor et al.

Table 1a. Observed residual correlation matrix of BCCI test questions for C1 using Yen's  $Q_3$  coefficients to assess local independence

|     | Q1          | Q2          | Q3          | Q4          | Q5          | Q6          | Q7          | Q8          | Q9          | Q10         | Q11         | Q12         | Q13         | Q14         | Q15         | Q16         | Q17         | Q18         | Q19         | Q20         |
|-----|-------------|-------------|-------------|-------------|-------------|-------------|-------------|-------------|-------------|-------------|-------------|-------------|-------------|-------------|-------------|-------------|-------------|-------------|-------------|-------------|
| Q1  | <b>1.00</b> |             |             |             |             |             |             |             |             |             |             |             |             |             |             |             |             |             |             |             |
| Q2  | -0.09       | <b>1.00</b> |             |             |             |             |             |             |             |             |             |             |             |             |             |             |             |             |             |             |
| Q3  | -0.01       | 0.10        | <b>1.00</b> |             |             |             |             |             |             |             |             |             |             |             |             |             |             |             |             |             |
| Q4  | -0.08       | 0.31        | -0.27       | <b>1.00</b> |             |             |             |             |             |             |             |             |             |             |             |             |             |             |             |             |
| Q5  | -0.16       | -0.29       | 0.07        | 0.05        | <b>1.00</b> |             |             |             |             |             |             |             |             |             |             |             |             |             |             |             |
| Q6  | 0.05        | -0.16       | 0.24        | -0.18       | 0.16        | <b>1.00</b> |             |             |             |             |             |             |             |             |             |             |             |             |             |             |
| Q7  | 0.09        | -0.25       | -0.34       | -0.04       | -0.09       | -0.06       | <b>1.00</b> |             |             |             |             |             |             |             |             |             |             |             |             |             |
| Q8  | 0.06        | -0.04       | -0.24       | -0.17       | -0.28       | -0.07       | 0.06        | <b>1.00</b> |             |             |             |             |             |             |             |             |             |             |             |             |
| Q9  | 0.01        | -0.07       | -0.06       | -0.01       | 0.13        | -0.22       | 0.15        | -0.08       | <b>1.00</b> |             |             |             |             |             |             |             |             |             |             |             |
| Q10 | -0.13       | -0.20       | -0.11       | 0.09        | 0.25        | -0.32       | -0.04       | 0.02        | 0.02        | <b>1.00</b> |             |             |             |             |             |             |             |             |             |             |
| Q11 | -0.12       | 0.16        | -0.20       | 0.21        | -0.02       | -0.27       | -0.12       | -0.14       | -0.03       | -0.13       | <b>1.00</b> |             |             |             |             |             |             |             |             |             |
| Q12 | 0.01        | -0.05       | -0.33       | 0.12        | -0.36       | -0.12       | -0.04       | 0.12        | 0.03        | 0.02        | -0.07       | <b>1.00</b> |             |             |             |             |             |             |             |             |
| Q13 | -0.05       | 0.01        | 0.09        | -0.06       | 0.15        | -0.01       | 0.27        | -0.27       | -0.13       | 0.02        | -0.29       | -0.27       | <b>1.00</b> |             |             |             |             |             |             |             |
| Q14 | 0.10        | 0.04        | -0.02       | -0.16       | -0.17       | -0.04       | 0.04        | 0.10        | -0.11       | -0.22       | -0.10       | -0.08       | 0.03        | <b>1.00</b> |             |             |             |             |             |             |
| Q15 | 0.14        | 0.10        | 0.02        | -0.23       | -0.44       | -0.12       | -0.24       | 0.02        | -0.22       | -0.07       | 0.11        | 0.11        | -0.20       | -0.02       | <b>1.00</b> |             |             |             |             |             |
| Q16 | -0.35       | -0.01       | -0.16       | 0.06        | 0.13        | -0.06       | -0.02       | -0.20       | 0.03        | -0.04       | -0.09       | 0.25        | -0.10       | -0.26       | -0.16       | <b>1.00</b> |             |             |             |             |
| Q17 | 0.01        | -0.17       | 0.01        | -0.25       | -0.16       | 0.06        | 0.05        | 0.00        | 0.19        | -0.09       | -0.17       | -0.16       | -0.14       | 0.04        | 0.21        | -0.09       | <b>1.00</b> |             |             |             |
| Q18 | -0.11       | -0.03       | -0.01       | -0.25       | -0.08       | 0.12        | -0.31       | 0.28        | -0.26       | -0.19       | 0.02        | 0.01        | -0.28       | -0.01       | 0.12        | 0.11        | -0.17       | <b>1.00</b> |             |             |
| Q19 | -0.01       | -0.23       | 0.06        | -0.02       | 0.08        | -0.12       | -0.07       | -0.17       | -0.22       | -0.02       | 0.21        | 0.09        | 0.17        | -0.24       | -0.10       | 0.11        | -0.15       | -0.12       | <b>1.00</b> |             |
| Q20 | -0.25       | 0.00        | 0.26        | 0.03        | -0.10       | 0.00        | -0.11       | -0.18       | -0.18       | 0.05        | 0.15        | -0.26       | 0.16        | 0.07        | -0.02       | -0.34       | -0.09       | 0.01        | -0.02       | <b>1.00</b> |

Table 1b. Observed residual correlation matrix of BCCI test questions for C2 using Yen's  $Q_3$  coefficients to assess local independence

|     | Q1          | Q2          | Q3          | Q4          | Q5          | Q6          | Q7          | Q8          | Q9          | Q10         | Q11         | Q12         | Q13         | Q14         | Q15         | Q16         | Q17         | Q18         | Q19         | Q20         |
|-----|-------------|-------------|-------------|-------------|-------------|-------------|-------------|-------------|-------------|-------------|-------------|-------------|-------------|-------------|-------------|-------------|-------------|-------------|-------------|-------------|
| Q1  | <b>1.00</b> |             |             |             |             |             |             |             |             |             |             |             |             |             |             |             |             |             |             |             |
| Q2  | 0.03        | <b>1.00</b> |             |             |             |             |             |             |             |             |             |             |             |             |             |             |             |             |             |             |
| Q3  | -0.18       | -0.07       | <b>1.00</b> |             |             |             |             |             |             |             |             |             |             |             |             |             |             |             |             |             |
| Q4  | -0.24       | -0.14       | -0.27       | <b>1.00</b> |             |             |             |             |             |             |             |             |             |             |             |             |             |             |             |             |
| Q5  | -0.16       | -0.07       | -0.12       | -0.05       | <b>1.00</b> |             |             |             |             |             |             |             |             |             |             |             |             |             |             |             |
| Q6  | 0.05        | -0.07       | 0.02        | 0.18        | -0.15       | <b>1.00</b> |             |             |             |             |             |             |             |             |             |             |             |             |             |             |
| Q7  | -0.01       | -0.17       | -0.07       | 0.03        | -0.05       | -0.13       | <b>1.00</b> |             |             |             |             |             |             |             |             |             |             |             |             |             |
| Q8  | -0.11       | -0.09       | 0.01        | 0.04        | -0.12       | -0.27       | 0.10        | <b>1.00</b> |             |             |             |             |             |             |             |             |             |             |             |             |
| Q9  | 0.01        | 0.00        | -0.18       | -0.22       | -0.10       | 0.05        | -0.14       | -0.10       | <b>1.00</b> |             |             |             |             |             |             |             |             |             |             |             |
| Q10 | 0.03        | -0.02       | -0.04       | -0.06       | 0.03        | -0.04       | -0.05       | -0.03       | 0.05        | <b>1.00</b> |             |             |             |             |             |             |             |             |             |             |
| Q11 | -0.10       | -0.17       | -0.03       | -0.09       | -0.02       | -0.06       | -0.01       | 0.09        | -0.11       | -0.01       | <b>1.00</b> |             |             |             |             |             |             |             |             |             |
| Q12 | -0.22       | -0.14       | 0.15        | 0.26        | -0.06       | -0.13       | -0.02       | 0.12        | -0.17       | 0.06        | -0.03       | <b>1.00</b> |             |             |             |             |             |             |             |             |
| Q13 | -0.09       | -0.02       | -0.05       | -0.04       | -0.11       | 0.01        | -0.10       | -0.26       | 0.18        | -0.31       | -0.18       | -0.13       | <b>1.00</b> |             |             |             |             |             |             |             |
| Q14 | 0.04        | -0.02       | -0.01       | -0.02       | -0.11       | -0.09       | 0.06        | -0.10       | -0.12       | -0.18       | -0.01       | -0.13       | -0.02       | <b>1.00</b> |             |             |             |             |             |             |
| Q15 | -0.04       | 0.00        | -0.16       | -0.01       | 0.01        | -0.01       | -0.08       | -0.06       | -0.02       | 0.17        | 0.03        | -0.11       | -0.20       | -0.07       | <b>1.00</b> |             |             |             |             |             |
| Q16 | -0.08       | -0.12       | 0.10        | -0.16       | 0.15        | -0.13       | 0.08        | 0.08        | 0.04        | -0.11       | 0.02        | -0.11       | -0.06       | -0.14       | -0.19       | <b>1.00</b> |             |             |             |             |
| Q17 | 0.18        | 0.17        | -0.01       | -0.15       | -0.18       | -0.23       | -0.22       | -0.09       | -0.12       | -0.03       | -0.17       | -0.08       | 0.05        | 0.01        | -0.15       | -0.12       | <b>1.00</b> |             |             |             |
| Q18 | -0.08       | 0.11        | -0.04       | -0.03       | -0.01       | 0.01        | -0.16       | -0.08       | -0.16       | -0.05       | -0.13       | -0.07       | 0.00        | 0.03        | 0.18        | -0.35       | -0.02       | <b>1.00</b> |             |             |
| Q19 | 0.05        | 0.00        | 0.07        | -0.10       | -0.02       | -0.12       | -0.15       | -0.28       | 0.00        | -0.34       | -0.01       | 0.11        | 0.20        | -0.03       | -0.12       | 0.00        | 0.13        | -0.02       | <b>1.00</b> |             |
| Q20 | -0.12       | -0.25       | -0.02       | 0.14        | 0.06        | -0.02       | -0.07       | 0.00        | 0.08        | -0.21       | -0.26       | -0.09       | 0.31        | -0.04       | -0.04       | -0.19       | 0.06        | 0.02        | -0.04       | <b>1.00</b> |

Table 1c. Observed residual correlation matrix of BCCI test questions for BioCal using Yen's  $Q_3$  coefficients to assess local independence

|     | Q1          | Q2          | Q3          | Q4          | Q5          | Q6          | Q7          | Q8          | Q9          | Q10         | Q11         | Q12         | Q13         | Q14         | Q15         | Q16         | Q17         | Q18         | Q19         | Q20         |
|-----|-------------|-------------|-------------|-------------|-------------|-------------|-------------|-------------|-------------|-------------|-------------|-------------|-------------|-------------|-------------|-------------|-------------|-------------|-------------|-------------|
| Q1  | <b>1.00</b> |             |             |             |             |             |             |             |             |             |             |             |             |             |             |             |             |             |             |             |
| Q2  | -0.16       | <b>1.00</b> |             |             |             |             |             |             |             |             |             |             |             |             |             |             |             |             |             |             |
| Q3  | 0.01        | -0.02       | <b>1.00</b> |             |             |             |             |             |             |             |             |             |             |             |             |             |             |             |             |             |
| Q4  | -0.40       | 0.08        | -0.29       | <b>1.00</b> |             |             |             |             |             |             |             |             |             |             |             |             |             |             |             |             |
| Q5  | -0.23       | -0.09       | -0.22       | 0.37        | <b>1.00</b> |             |             |             |             |             |             |             |             |             |             |             |             |             |             |             |
| Q6  | -0.16       | 0.04        | -0.09       | 0.04        | -0.08       | <b>1.00</b> |             |             |             |             |             |             |             |             |             |             |             |             |             |             |
| Q7  | 0.01        | -0.15       | 0.07        | -0.17       | -0.20       | -0.07       | <b>1.00</b> |             |             |             |             |             |             |             |             |             |             |             |             |             |
| Q8  | -0.08       | -0.04       | -0.15       | -0.17       | -0.09       | -0.31       | -0.09       | <b>1.00</b> |             |             |             |             |             |             |             |             |             |             |             |             |
| Q9  | -0.15       | -0.11       | -0.18       | -0.01       | 0.08        | -0.18       | 0.10        | -0.03       | <b>1.00</b> |             |             |             |             |             |             |             |             |             |             |             |
| Q10 | -0.07       | -0.16       | 0.02        | -0.04       | -0.27       | 0.01        | 0.29        | 0.01        | -0.16       | <b>1.00</b> |             |             |             |             |             |             |             |             |             |             |
| Q11 | -0.22       | -0.23       | -0.06       | 0.11        | 0.15        | -0.10       | -0.17       | -0.06       | 0.22        | 0.07        | <b>1.00</b> |             |             |             |             |             |             |             |             |             |
| Q12 | 0.06        | 0.30        | -0.10       | -0.18       | -0.12       | -0.01       | -0.22       | 0.16        | -0.15       | -0.27       | -0.09       | <b>1.00</b> |             |             |             |             |             |             |             |             |
| Q13 | 0.03        | 0.02        | 0.21        | -0.29       | -0.43       | -0.04       | 0.01        | -0.12       | -0.18       | 0.09        | -0.05       | -0.13       | <b>1.00</b> |             |             |             |             |             |             |             |
| Q14 | 0.27        | -0.25       | -0.25       | 0.07        | -0.02       | -0.04       | -0.06       | 0.02        | -0.07       | -0.06       | -0.03       | -0.16       | 0.00        | <b>1.00</b> |             |             |             |             |             |             |
| Q15 | 0.17        | -0.21       | 0.15        | -0.01       | -0.22       | -0.15       | 0.15        | -0.10       | -0.15       | -0.01       | -0.09       | -0.03       | 0.09        | -0.08       | <b>1.00</b> |             |             |             |             |             |
| Q16 | -0.02       | 0.13        | -0.07       | -0.03       | 0.15        | 0.03        | -0.11       | -0.05       | 0.08        | -0.03       | -0.27       | 0.18        | -0.25       | -0.17       | -0.28       | <b>1.00</b> |             |             |             |             |
| Q17 | -0.03       | -0.17       | 0.18        | -0.11       | -0.01       | 0.07        | -0.14       | -0.07       | 0.01        | -0.18       | -0.15       | -0.22       | 0.09        | -0.23       | 0.05        | -0.16       | <b>1.00</b> |             |             |             |
| Q18 | 0.01        | 0.10        | 0.05        | -0.08       | -0.05       | -0.17       | -0.10       | -0.17       | -0.15       | -0.14       | -0.15       | 0.03        | 0.30        | -0.13       | -0.03       | -0.24       | 0.08        | <b>1.00</b> |             |             |
| Q19 | 0.08        | -0.10       | -0.01       | -0.09       | 0.05        | 0.19        | -0.17       | 0.20        | -0.14       | -0.34       | 0.07        | -0.07       | -0.29       | 0.08        | -0.12       | -0.04       | 0.03        | -0.10       | <b>1.00</b> |             |
| Q20 | -0.21       | 0.05        | -0.26       | 0.12        | 0.17        | -0.11       | -0.03       | 0.06        | 0.16        | 0.14        | 0.13        | 0.04        | -0.08       | -0.04       | -0.25       | 0.15        | 0.02        | -0.24       | -0.26       | <b>1.00</b> |
